# Supplementary material for: Technical note: A simple approach for efficient collection of field reference data for calibrating remote sensing mapping of northern wetlands
Source: Copernicus journal article supplement (doi:10.5194/bg-15-1549-2018), 2018-03-15
Supplement: Supplementary file 1 [file bg-15-1549-2018-supplement.pdf]

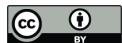

## *Supplement of*

# **Technical note: A simple approach for efficient collection of field reference data for calibrating remote sensing mapping of northern wetlands**

**Magnus Gålfalk et al.**

*Correspondence to:* Magnus Gålfalk ([magnus.galfalk@liu.se](mailto:magnus.galfalk@liu.se))

The copyright of individual parts of the supplement might differ from the CC BY 4.0 License.

## Supplementary material S1 - Manual

Preparations – what is needed?

- A remote controlled camera with a wide field of view is required, e.g. a GoPro with a waterproof casing
- Remote control for the camera (e.g. an app on a mobile phone or tablet).
- A tripod and/or monopods giving an extendable total length of at least 3 m (e.g. a tripod and a monopod put together). > 4 m height is preferred.
- Note the camera model (if known also the horizontal and vertical field of view in degrees). This is important to be able to obtain the projected geometry.
- A GPS for recording GPS position of the plots
- A log to write camera altitudes, plot descriptions etc.
- Make a calibration photo of the ground, with several distances marked on the ground in both directions (see Fig. 5 which is our calibration image after correction for lens distortion). Note the camera altitude used. Other altitudes can be used in the field although only one calibration photo is needed.

For each field plot:

1. One person holds the extended tripod supported by the ground (Fig. 1) or lifts it up for higher camera altitudes (e.g. when tall vegetation such as bushes are present).
2. Imaging should be done from an altitude of at least 3 m (for a 90 degree field of a view and 10 x 10 m area)  
Alternative 1 (which we have used) is to stand at the edge of a plot and tilt the camera so that the horizon appears close to the top of the image (Fig. 2A). This horizon coordinate can then be used in post-processing to find angles in the image. With a vertical field of view of at least 90 degrees, nadir angles will also be present in the same image.  
Alternative 2 is to stand in the center of the plot and tilt the camera straight down (nadir direction). This will make all the angles in the image closer to nadir which makes the classifications easier (as tall vegetation will not obscure the view towards lower vegetation as much). The person and tripod will be included in the image using this method but will only take up a small part of the image which can be avoided in post processing classification.
3. Another person notes the camera height, GPS position, the direction of the field of view relative to the GPS position, and uses a remote control (such as an app on a water proof mobile phone) to take an image of the plot. The time should be noted in the log for each plot so that images can be matched to the correct GPS positions.





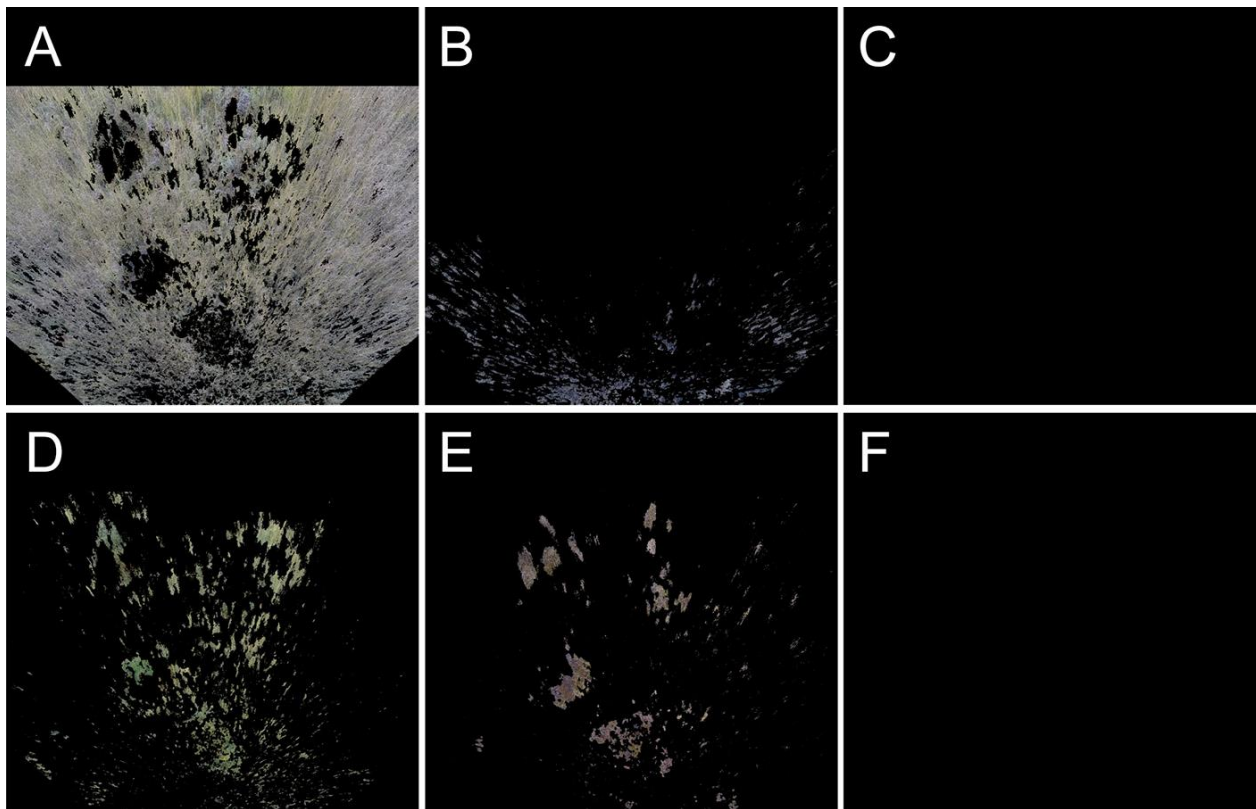

Figure S3: Additional example of a field plot image with classification into the six main surface components (the plot shown in Fig. S1). All panels have an area of 10 x 10 m. (A) Graminoids. (B) Water. (C) Shrubs. (D) Dry moss. (E) Wet moss. (F) Rock.
